# Supplementary material
Source: PubMed Central journal article supplement (PMC1732875)

Figure 1. The impact of social position on GHQ, controlling for age and sex

a) Income

Deviance (-2 x log likelihood) = 242627.6

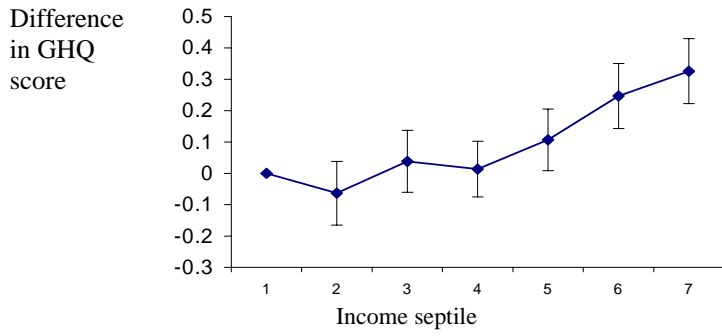

b) Cambridge

Deviance = 242679

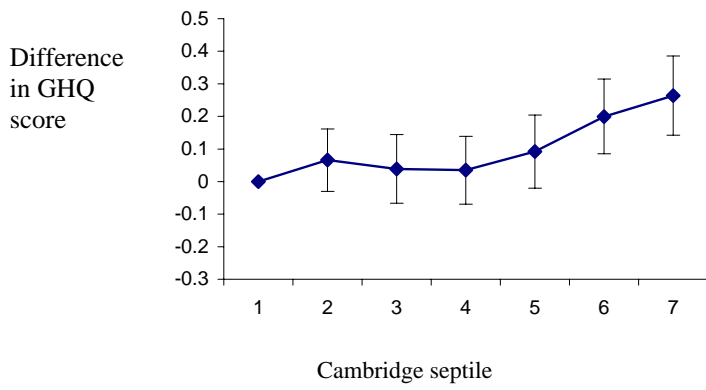

c) NS-SEC

Deviance = 242689

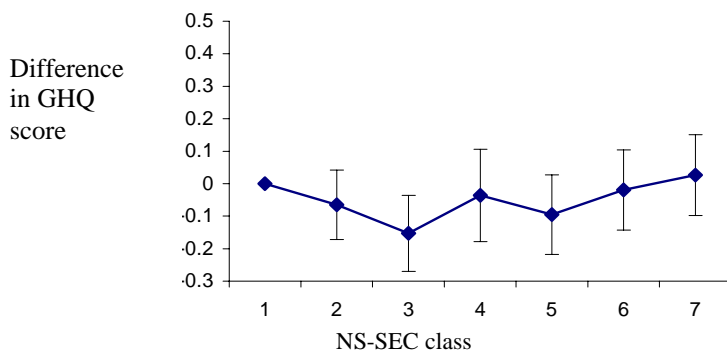

**Figure 2.1** The impact of social position on GHQ, controlling for job status, age and sex

a) *Income*

*Deviance (-2 x log likelihood) = 240658.8*

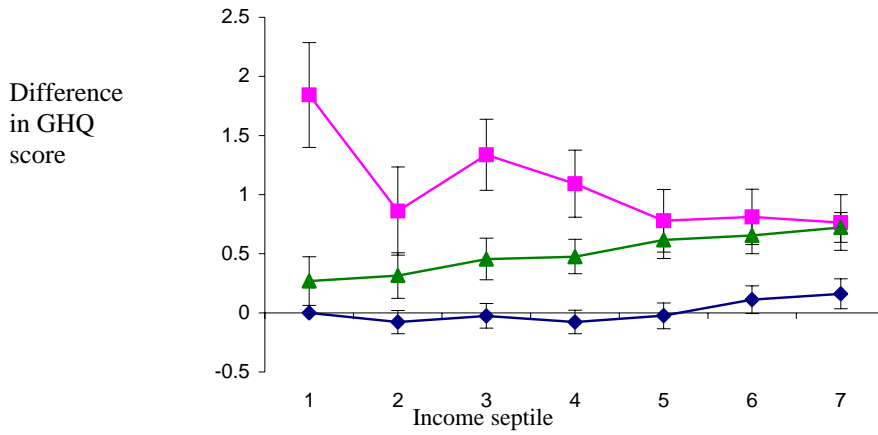

b) *Cambridge*

*Deviance = 240682.9*

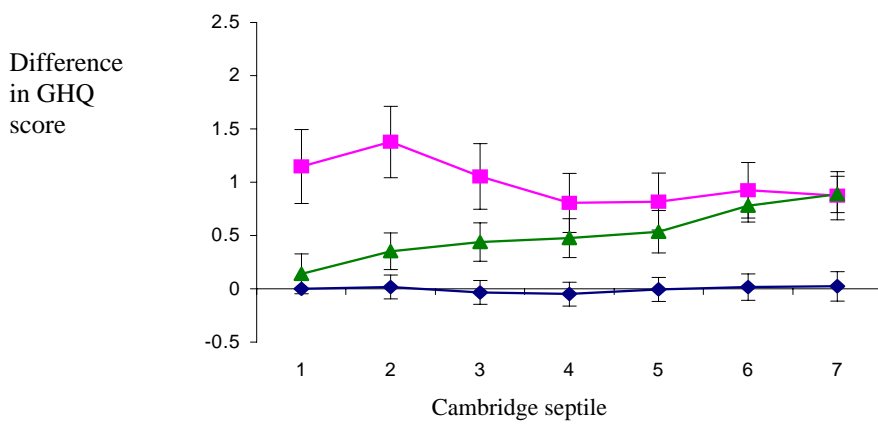

b) *NS-SEC*

*Deviance = 240689.8*

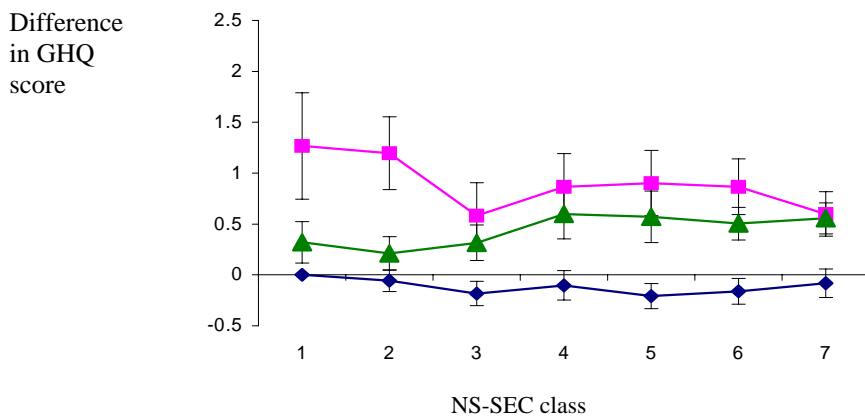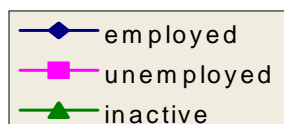

**Figure 2.2** The impact of social position on GHQ, controlling for ghq-lag, age and sex

a) *Income*

*Deviance (-2 x log likelihood) = 240700.4*

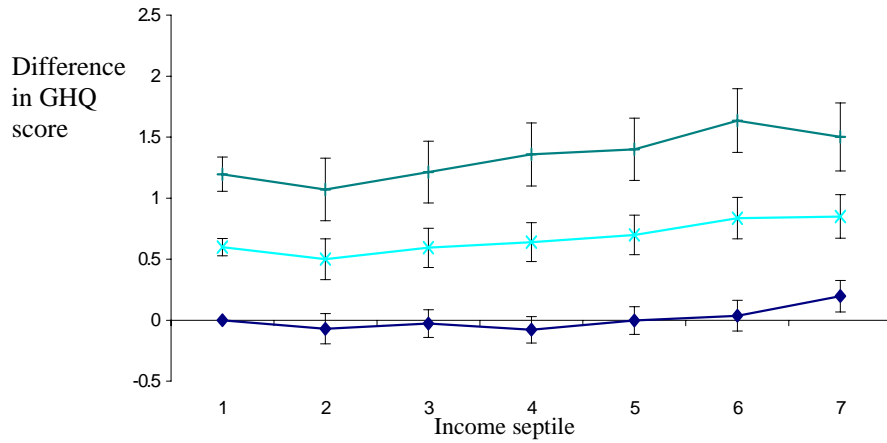

b) *Cambridge*

*Deviance = 240685.9*

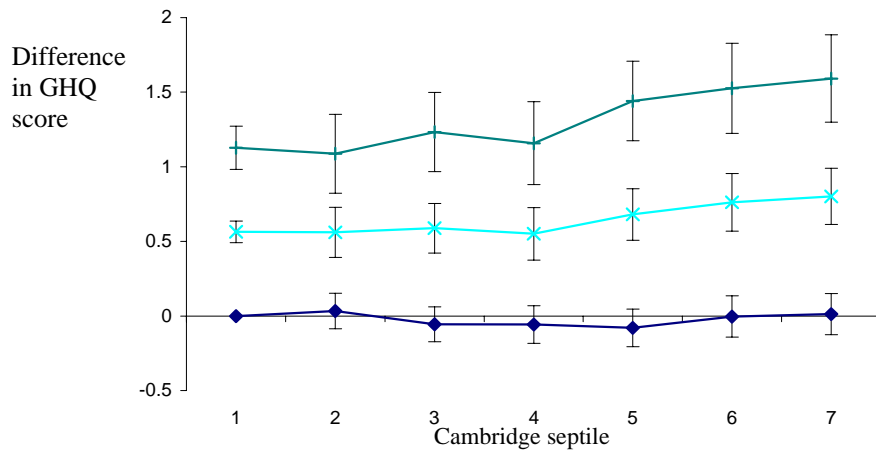

c) *NS-SEC*

*Deviance = 240700*

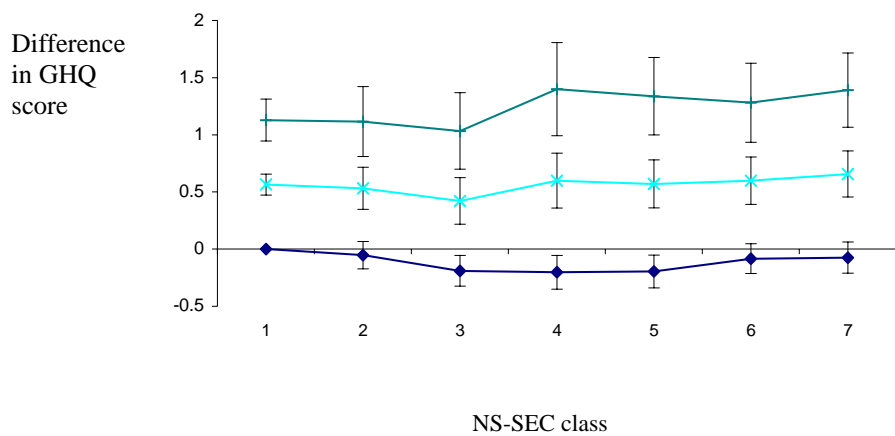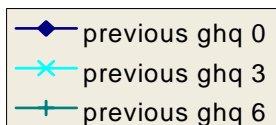

**Figure 3. The impact of social position on GHQ, controlling for ghq-lag, age and sex for the “ever economically inactive”**

**1. Income**

*Deviance (-2 x log likelihood) = 240484.4*

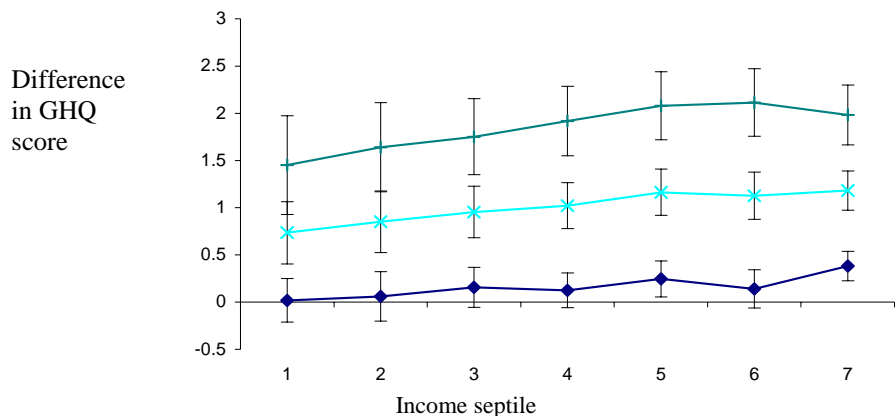

**2. Cambridge**

*Deviance = 240497.6*

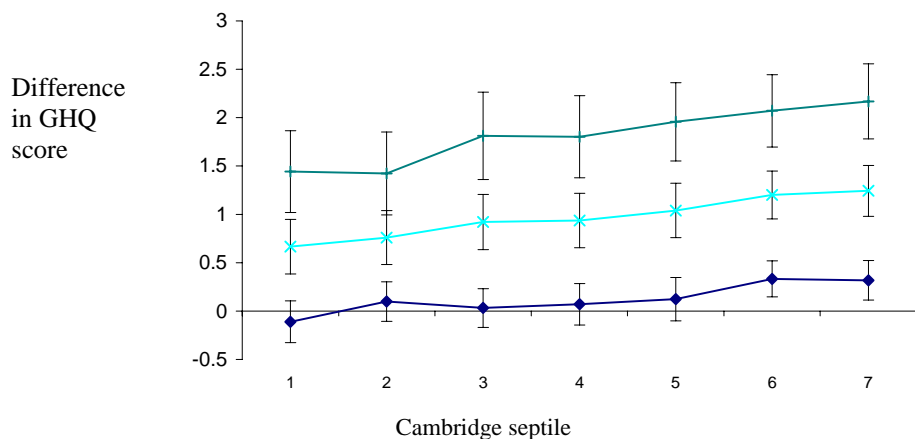

**3. NS-SEC**

*Deviance = 240496.5*

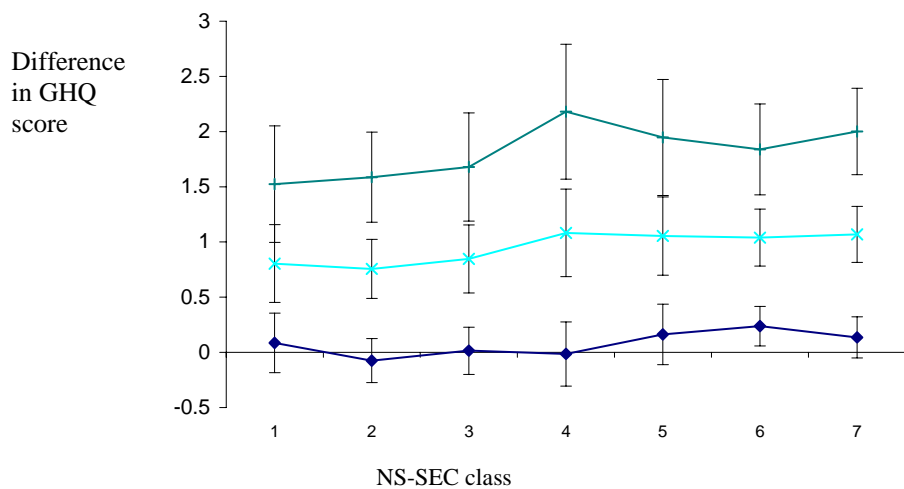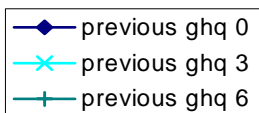

Supplement: jepicomh_58_9_779__1.pdf [file jepicomh_58_9_779__1.pdf]
